# Supplementary material for: Clonal diversity and genetic variation of the sedge Carex nigra in an alpine fen depend on soil nutrients
Source: PeerJ journal article supplement (doi:10.7717/peerj.8887), 2020-06-03
Supplement: Reisch_PeerJ_2019_Figure_S2.pdf [file Reisch_PeerJ_2019_Figure_S2.pdf]

Figure S2

**Plot 01**

|    | A | B | C | D | E | F | G | H | I | J |
|----|---|---|---|---|---|---|---|---|---|---|
| 1  | B |   |   |   |   |   |   |   |   | B |
| 2  |   | B |   |   |   |   |   |   |   | B |
| 3  |   |   | B |   |   |   |   |   | A |   |
| 4  |   |   |   | A |   |   | A |   |   |   |
| 5  |   |   |   |   | A | A |   |   |   |   |
| 6  |   |   |   |   | A | A |   |   |   |   |
| 7  |   |   |   | A |   |   |   | A |   |   |
| 8  |   |   | A |   |   |   |   |   | A |   |
| 9  |   | A |   |   |   |   |   |   |   | A |
| 10 | A |   |   |   |   |   |   |   |   | A |

**Plot 02**

|    | A | B | C | D | E | F | G | H | I | J |
|----|---|---|---|---|---|---|---|---|---|---|
| 1  | A |   |   |   |   |   |   |   |   | A |
| 2  |   | A |   |   |   |   |   |   |   | A |
| 3  |   |   | A |   |   |   |   |   | A |   |
| 4  |   |   |   | A |   |   | A |   |   |   |
| 5  |   |   |   |   | A | A |   |   |   |   |
| 6  |   |   |   |   | A | A |   |   |   |   |
| 7  |   |   |   | A |   |   |   | A |   |   |
| 8  |   |   | A |   |   |   |   |   | A |   |
| 9  |   | A |   |   |   |   |   |   |   | A |
| 10 | A |   |   |   |   |   |   |   |   | A |

**Plot 03**

|    | A | B | C | D | E | F | G | H | I | J |
|----|---|---|---|---|---|---|---|---|---|---|
| 1  | C |   |   |   |   |   |   |   |   | C |
| 2  |   | C |   |   |   |   |   |   |   | C |
| 3  |   |   | C |   |   |   |   |   | C |   |
| 4  |   |   |   | A |   |   |   | C |   |   |
| 5  |   |   |   |   | C | C |   |   |   |   |
| 6  |   |   |   |   | C | C |   |   |   |   |
| 7  |   |   |   | A |   |   |   | C |   |   |
| 8  |   |   | C |   |   |   |   |   | C |   |
| 9  |   | C |   |   |   |   |   |   |   | C |
| 10 | C |   |   |   |   |   |   |   |   | D |

**Plot 04**

|    | A | B | C | D | E | F | G | H | I | J |
|----|---|---|---|---|---|---|---|---|---|---|
| 1  | C |   |   |   |   |   |   |   |   | C |
| 2  |   | A |   |   |   |   |   |   |   | C |
| 3  |   |   | C |   |   |   |   |   | C |   |
| 4  |   |   |   | A |   |   | A |   |   |   |
| 5  |   |   |   |   | A | C |   |   |   |   |
| 6  |   |   |   |   | A | C |   |   |   |   |
| 7  |   |   |   | A |   |   |   | C |   |   |
| 8  |   |   | A |   |   |   |   |   | C |   |
| 9  |   | E |   |   |   |   |   |   |   | C |
| 10 | A |   |   |   |   |   |   |   |   | C |

**Plot 05**

|    | A | B | C | D | E | F | G | H | I | J |
|----|---|---|---|---|---|---|---|---|---|---|
| 1  | F |   |   |   |   |   |   |   |   | K |
| 2  |   | C |   |   |   |   |   |   |   | F |
| 3  |   |   | F |   |   |   |   |   | J |   |
| 4  |   |   |   | C |   |   |   | F |   |   |
| 5  |   |   |   |   | I | J |   |   |   |   |
| 6  |   |   |   |   | I | F |   |   |   |   |
| 7  |   |   |   | H |   |   |   | C |   |   |
| 8  |   |   | A |   |   |   |   |   | C |   |
| 9  |   | A |   |   |   |   |   |   |   | C |
| 10 | G |   |   |   |   |   |   |   |   | C |

**Plot 06**

|    | A | B | C | D | E | F | G | H | I | J |
|----|---|---|---|---|---|---|---|---|---|---|
| 1  | A |   |   |   |   |   |   |   |   | C |
| 2  |   | B |   |   |   |   |   |   |   | C |
| 3  |   |   | A |   |   |   |   |   | C |   |
| 4  |   |   |   | C |   |   | B |   |   |   |
| 5  |   |   |   |   | C | B |   |   |   |   |
| 6  |   |   |   |   | C | C |   |   |   |   |
| 7  |   |   |   | C |   |   |   | C |   |   |
| 8  |   |   | C |   |   |   |   |   | C |   |
| 9  |   | C |   |   |   |   |   |   |   | C |
| 10 | C |   |   |   |   |   |   |   |   | C |

**Plot 07**

|    | A | B | C | D | E | F | G | H | I | J |
|----|---|---|---|---|---|---|---|---|---|---|
| 1  | A |   |   |   |   |   |   |   |   | A |
| 2  |   | A |   |   |   |   |   |   |   | A |
| 3  |   |   | A |   |   |   |   |   | A |   |
| 4  |   |   |   | A |   |   | D |   |   |   |
| 5  |   |   |   |   | A | A |   |   |   |   |
| 6  |   |   |   |   | A | A |   |   |   |   |
| 7  |   |   |   | A |   |   |   | A |   |   |
| 8  |   |   | A |   |   |   |   |   | L |   |
| 9  |   | A |   |   |   |   |   |   |   | A |
| 10 | A |   |   |   |   |   |   |   |   | A |

**Plot 08**

|    | A | B | C | D | E | F | G | H | I | J |
|----|---|---|---|---|---|---|---|---|---|---|
| 1  | A |   |   |   |   |   |   |   |   | A |
| 2  |   | A |   |   |   |   |   |   |   | A |
| 3  |   |   | A |   |   |   |   |   | A |   |
| 4  |   |   |   | A |   |   | A |   |   |   |
| 5  |   |   |   |   | A | A |   |   |   |   |
| 6  |   |   |   |   | A | A |   |   |   |   |
| 7  |   |   |   | A |   |   |   | A |   |   |
| 8  |   |   | A |   |   |   |   |   | A |   |
| 9  |   | A |   |   |   |   |   |   |   | A |
| 10 | A |   |   |   |   |   |   |   |   | A |

**Plot 09**

|    | A | B | C | D | E | F | G | H | I | J |
|----|---|---|---|---|---|---|---|---|---|---|
| 1  | A |   |   |   |   |   |   |   |   | I |
| 2  |   | A |   |   |   |   |   |   | H |   |
| 3  |   |   | B |   |   |   |   | I |   |   |
| 4  |   |   |   | H |   |   | I |   |   |   |
| 5  |   |   |   |   | H | I |   |   |   |   |
| 6  |   |   |   |   | I | I |   |   |   |   |
| 7  |   |   | C |   |   |   | I |   |   |   |
| 8  |   | C |   |   |   |   |   | I |   |   |
| 9  |   | C |   |   |   |   |   |   | H |   |
| 10 | H |   |   |   |   |   |   |   |   | E |

**Plot 10**

|    | A | B | C | D | E | F | G | H | I | J |
|----|---|---|---|---|---|---|---|---|---|---|
| 1  | M |   |   |   |   |   |   |   |   | M |
| 2  |   | M |   |   |   |   |   |   | M |   |
| 3  |   |   | M |   |   |   |   | M |   |   |
| 4  |   |   |   | M |   |   | M |   |   |   |
| 5  |   |   |   |   | M | C |   |   |   |   |
| 6  |   |   |   |   | M | M |   |   |   |   |
| 7  |   |   | M |   |   |   | M |   |   |   |
| 8  |   | M |   |   |   |   |   | M |   |   |
| 9  |   | M |   |   |   |   |   |   | M |   |
| 10 | M |   |   |   |   |   |   |   |   | M |

**Plot 11**

|    | A | B | C | D | E | F | G | H | I | J |
|----|---|---|---|---|---|---|---|---|---|---|
| 1  | C |   |   |   |   |   |   |   |   | B |
| 2  |   | C |   |   |   |   |   |   | C |   |
| 3  |   |   | C |   |   |   |   | C |   |   |
| 4  |   |   |   | B |   |   | C |   |   |   |
| 5  |   |   |   |   | B | C |   |   |   |   |
| 6  |   |   |   |   | C | C |   |   |   |   |
| 7  |   |   | C |   |   |   | C |   |   |   |
| 8  |   | C |   |   |   |   |   | C |   |   |
| 9  |   | C |   |   |   |   |   |   | C |   |
| 10 | C |   |   |   |   |   |   |   |   | C |

**Plot 12**

|    | A | B | C | D | E | F | G | H | I | J |
|----|---|---|---|---|---|---|---|---|---|---|
| 1  | N |   |   |   |   |   |   |   |   | N |
| 2  |   | I |   |   |   |   |   |   | I |   |
| 3  |   |   | J |   |   |   |   | I |   |   |
| 4  |   |   |   | I |   |   | I |   |   |   |
| 5  |   |   |   |   | N | I |   |   |   |   |
| 6  |   |   |   |   | I | I |   |   |   |   |
| 7  |   |   | J |   |   |   | N |   |   |   |
| 8  |   | N |   |   |   |   |   | I |   |   |
| 9  |   | A |   |   |   |   |   |   | I |   |
| 10 | A |   |   |   |   |   |   |   |   | I |

**Plot 13**

|    | A | B | C | D | E | F | G | H | I | J |
|----|---|---|---|---|---|---|---|---|---|---|
| 1  | A |   |   |   |   |   |   |   |   | A |
| 2  |   | A |   |   |   |   |   |   | A |   |
| 3  |   |   | A |   |   |   |   | E |   |   |
| 4  |   |   |   | A |   |   | A |   |   |   |
| 5  |   |   |   |   | A | A |   |   |   |   |
| 6  |   |   |   |   | A | B |   |   |   |   |
| 7  |   |   | A |   |   |   | B |   |   |   |
| 8  |   | A |   |   |   |   |   | B |   |   |
| 9  |   | A |   |   |   |   |   |   | B |   |
| 10 | A |   |   |   |   |   |   |   |   | B |

**Plot 14**

|    | A | B | C | D | E | F | G | H | I | J |
|----|---|---|---|---|---|---|---|---|---|---|
| 1  | A |   |   |   |   |   |   |   |   | A |
| 2  |   | A |   |   |   |   |   |   | A |   |
| 3  |   |   | A |   |   |   |   | A |   |   |
| 4  |   |   |   | K |   |   | A |   |   |   |
| 5  |   |   |   |   | A | K |   |   |   |   |
| 6  |   |   |   |   | A | K |   |   |   |   |
| 7  |   |   | A |   |   |   | K |   |   |   |
| 8  |   | A |   |   |   |   |   | A |   |   |
| 9  |   | A |   |   |   |   |   |   | A |   |
| 10 | F |   |   |   |   |   |   |   |   | A |

**Plot 15**

|    | A | B | C | D | E | F | G | H | I | J |
|----|---|---|---|---|---|---|---|---|---|---|
| 1  | A |   |   |   |   |   |   |   |   | K |
| 2  |   | C |   |   |   |   |   |   | A |   |
| 3  |   |   | A |   |   |   |   | K |   |   |
| 4  |   |   |   | C |   |   | K |   |   |   |
| 5  |   |   |   |   | C | K |   |   |   |   |
| 6  |   |   |   |   | C | C |   |   |   |   |
| 7  |   |   | C |   |   |   | C |   |   |   |
| 8  |   | C |   |   |   |   |   | C |   |   |
| 9  |   | C |   |   |   |   |   |   | K |   |
| 10 | C |   |   |   |   |   |   |   |   | C |

**Plot 16**

|    | A | B | C | D | E | F | G | H | I | J |
|----|---|---|---|---|---|---|---|---|---|---|
| 1  | A |   |   |   |   |   |   |   |   | A |
| 2  |   | A |   |   |   |   |   |   | A |   |
| 3  |   |   | A |   |   |   |   | A |   |   |
| 4  |   |   |   | A |   |   | A |   |   |   |
| 5  |   |   |   |   | A | A |   |   |   |   |
| 6  |   |   |   |   | A | A |   |   |   |   |
| 7  |   |   | A |   |   |   | A |   |   |   |
| 8  |   | A |   |   |   |   |   | A |   |   |
| 9  |   | A |   |   |   |   |   |   | A |   |
| 10 | A |   |   |   |   |   |   |   |   | A |
