# Supplementary material for: Clonal diversity and genetic variation of the sedge Carex nigra in an alpine fen depend on soil nutrients
Source: PeerJ. 2020 Jun 3;8:e8887. doi: 10.7717/peerj.8887 (PMC7275680; doi:10.7717/peerj.8887)
Supplement: Supplemental Information 1 [file peerj-08-8887-s001.xlsx]

## Sheet: Tabelle1
	S082		S245		S175		S102		S119
W1A1	189	189	203	203	123	126	96	96	178	178
W1A10	189	189	203	203	123	123	96	96	178	178
W1B2	189	189	203	203	124	127	96	96	178	178
W1B9	189	189	204	204	123	123	96	96	178	178
W1C3	189	189	203	203	123	126	96	96	178	178
W1C8	189	189	203	203	123	123	96	96	178	178
W1D4	189	189	203	203	123	123	96	96	178	178
W1D7	189	189	203	203	123	123	96	96	178	178
W1E5	189	189	203	203	123	123	96	96	179	179
W1E6	189	189	203	203	123	123	96	96	178	178
W1F5	189	189	203	203	123	123	96	96	178	178
W1F6	189	189	203	203	123	123	96	96	178	178
W1G4	189	189	203	203	123	123	96	96	178	178
W1G7	189	189	203	203	123	123	96	96	178	178
W1H3	189	189	203	203	123	123	96	96	178	178
W1H8	189	189	203	203	123	123	96	96	178	178
W1I2	189	189	203	203	123	127	96	96	178	178
W1I9	189	189	203	203	123	123	96	96	177	177
W1J1	189	189	203	203	123	126	96	96	177	177
W1J10	189	189	203	203	123	123	96	96	177	177
W2A1	189	189	203	203	123	123	96	96	177	177
W2A10	189	189	203	203	123	123	96	96	177	177
W2B2	189	189	203	203	123	123	96	96	176	176
W2B9	189	189	203	203	123	123	96	96	177	177
W2C3	189	189	203	203	123	123	96	96	178	178
W2C8	189	189	203	203	123	123	96	96	178	178
W2D4	189	189	203	203	123	123	96	96	178	178
W2D7	189	189	203	203	123	123	96	96	178	178
W2E5	189	189	203	203	123	123	96	96	178	178
W2E6	189	189	203	203	123	123	96	96	178	178
W2F5	189	189	203	203	123	123	96	96	178	178
W2F6	189	189	203	203	123	123	96	96	178	178
W2G4	189	189	203	203	123	123	96	96	178	178
W2G7	189	189	203	203	123	123	96	96	179	179
W2H3	189	189	203	203	123	123	96	96	177	177
W2H8	188	188	203	203	123	123	96	96	177	177
W2I2	189	189	203	203	123	123	96	96	177	177
W2I9	189	189	203	203	123	123	96	96	177	177
W2J1	189	189	203	203	123	123	96	96	178	178
W2J10	189	189	203	203	123	123	96	96	178	178
W3A1	189	189	203	213	123	123	96	96	177	177
W3A10	189	189	203	213	123	123	96	96	177	177
W3B2	189	189	203	213	123	123	96	96	177	177
W3B9	189	189	203	213	123	123	96	96	177	177
W3C3	189	189	203	213	123	123	96	96	177	177
W3C8	189	189	203	213	123	123	96	96	177	177
W3D4	187	187	203	203	123	123	96	96	177	177
W3D7	189	189	203	213	123	123	96	96	177	177
W3E5	189	189	203	213	123	123	96	96	178	178
W3E6	188	188	203	213	123	123	96	96	178	178
W3F5	189	189	203	213	123	123	96	96	178	178
W3F6	189	189	203	213	124	124	96	96	178	178
W3G4	189	189	203	213	123	123	96	96	178	178
W3G7	189	189	203	213	124	124	96	96	178	178
W3H3	189	189	203	213	123	123	96	96	178	178
W3H8	189	189	203	213	123	123	96	96	178	178
W3I2	189	189	203	213	123	123	96	96	178	178
W3I9	189	189	203	213	123	123	96	96	178	178
W3J1	189	189	203	213	123	123	96	96	178	178
W3J10	180	180	203	203	123	123	96	96	178	178
W4A1	189	189	203	213	123	123	96	96	178	178
W4A10	189	189	203	203	123	123	96	96	178	178
W4B2	189	189	203	203	123	123	96	96	178	178
W4B9	189	189	203	203	124	124	96	96	178	178
W4C3	189	189	203	213	124	124	96	96	177	177
W4C8	189	189	203	203	124	124	96	96	177	177
W4D4	189	189	203	203	123	123	96	96	177	177
W4D7	189	189	203	203	123	123	96	96	177	177
W4E5	189	189	203	203	123	123	96	96	177	177
W4E6	189	189	203	203	123	123	96	96	177	177
W4F5	189	189	203	213	123	123	96	96	177	177
W4F6	189	189	203	213	123	123	96	96	177	177
W4G4	189	189	203	213	123	123	96	96	178	178
W4G7	189	189	203	203	123	123	96	96	178	178
W4H3	189	189	203	213	123	123	96	96	178	178
W4H8	189	189	203	213	126	126	96	96	178	178
W4I2	189	189	203	213	123	123	96	96	178	178
W4I9	189	189	203	213	123	123	96	96	178	178
W4J1	189	189	203	213	123	123	96	96	178	178
W4J10	189	189	203	213	126	126	96	96	178	178
W5A1	189	189	203	215	123	126	96	96	178	178
W5A10	183	183	213	213	126	126	96	96	181	181
W5B2	189	189	203	212	123	123	96	96	178	178
W5B9	189	189	203	203	123	123	96	96	178	178
W5C3	189	189	203	215	123	126	96	96	178	178
W5C8	189	189	203	203	123	123	96	96	178	178
W5D4	188	188	203	213	123	123	96	96	178	178
W5D7	189	189	203	213	124	124	96	96	178	178
W5E5	189	189	203	213	123	126	96	96	177	177
W5E6	189	189	203	213	123	126	96	96	177	177
W5F5	189	189	213	213	123	126	96	96	177	177
W5F6	189	189	203	215	123	126	96	96	177	177
W5G4	189	189	203	215	123	126	96	96	177	177
W5G7	189	189	203	213	123	123	96	96	177	177
W5H3	189	189	213	213	123	126	96	96	177	177
W5H8	189	189	203	213	123	123	96	96	177	177
W5I2	189	189	203	215	123	126	96	96	178	178
W5I9	189	189	203	213	123	123	96	96	178	178
W5J1	189	189	204	215	123	123	96	96	178	178
W5J10	189	189	204	213	123	123	96	96	178	178
W6A1	188	188	203	203	124	124	96	96	178	178
W6A10	188	188	203	212	123	123	96	96	178	178
W6B2	188	188	203	203	123	127	96	96	178	178
W6B9	188	188	203	212	123	123	96	96	178	178
W6C3	189	189	203	203	124	124	96	96	177	177
W6C8	189	189	203	212	123	123	96	96	178	178
W6D4	188	188	203	212	123	123	96	96	178	178
W6D7	188	188	203	212	123	123	97	97	178	178
W6E5	188	188	203	212	123	123	96	96	178	178
W6E6	188	188	203	212	123	123	96	96	178	178
W6F5	188	188	203	203	123	126	96	96	178	178
W6F6	188	188	203	212	123	123	96	96	178	178
W6G4	189	189	203	203	124	127	96	96	177	177
W6G7	189	189	203	212	123	123	96	96	177	177
W6H3	188	188	203	212	123	123	96	96	177	177
W6H8	188	188	203	212	123	123	96	96	177	177
W6I2	188	188	203	212	123	123	96	96	177	177
W6I9	188	188	203	212	123	123	96	96	177	177
W6J1	188	188	203	212	123	123	96	96	177	177
W6J10	188	188	203	212	123	123	96	96	177	177
W7A1	188	188	203	203	124	124	96	96	177	177
W7A10	189	189	203	203	123	123	96	96	178	178
W7B2	188	188	203	203	123	123	96	96	178	178
W7B9	188	188	203	203	123	123	96	96	178	178
W7C3	188	188	203	203	123	123	96	96	178	178
W7C8	188	188	203	203	123	123	96	96	178	178
W7D4	188	188	203	203	123	123	96	96	178	178
W7D7	188	188	203	203	123	123	96	96	178	178
W7E5	189	189	203	203	124	124	96	96	177	177
W7E6	189	189	203	203	124	124	96	96	177	177
W7F5	188	188	203	203	124	124	96	96	177	177
W7F6	188	188	203	203	124	124	96	96	177	177
W7G4	180	180	203	203	123	123	96	96	177	177
W7G7	189	189	203	203	123	123	96	96	177	177
W7H3	188	188	203	203	123	123	96	96	177	177
W7H8	183	186	213	213	127	127	96	96	177	177
W7I2	189	189	203	203	123	123	96	96	176	176
W7I9	189	189	203	203	123	123	96	96	176	176
W7J1	189	189	203	203	123	123	96	96	177	177
W7J10	189	189	203	203	123	123	96	96	177	177
W8A1	189	189	203	203	123	123	96	96	177	177
W8A10	189	189	203	203	123	123	96	96	178	178
W8B2	189	189	203	203	123	123	96	96	177	177
W8B9	189	189	203	203	123	123	96	96	176	176
W8C3	189	189	203	203	123	123	96	96	178	178
W8C8	189	189	203	203	123	123	96	96	178	178
W8D4	189	189	203	203	123	123	96	96	178	178
W8D7	189	189	203	203	123	123	96	96	178	178
W8E5	189	189	203	203	123	123	96	96	178	178
W8E6	189	189	203	203	123	123	96	96	178	178
W8F5	189	189	203	203	123	123	96	96	178	178
W8F6	189	189	203	203	123	123	96	96	178	178
W8G4	189	189	203	203	123	123	96	96	178	178
W8G7	189	189	203	203	123	123	96	96	178	178
W8H3	189	189	203	203	123	123	96	96	178	178
W8H8	189	189	203	203	123	123	96	96	178	178
W8I2	189	189	203	203	123	123	96	96	178	178
W8I9	189	189	203	203	123	123	96	96	178	178
W8J1	189	189	203	203	123	123	96	96	178	178
W8J10	189	189	203	203	123	123	96	96	178	178
D1A1	189	189	203	203	124	124	96	96	176	176
D1A10	189	189	203	213	126	126	96	96	177	177
D1B2	188	188	203	203	123	123	96	96	177	177
D1B9	189	189	203	213	123	126	96	96	177	177
D1C3	189	189	203	203	123	123	96	96	178	178
D1C8	188	188	203	212	123	126	96	96	178	178
D1D4	189	189	203	213	126	126	96	96	177	177
D1D7	189	189	203	213	123	127	96	96	177	177
D1E5	188	188	203	212	127	127	96	96	178	178
D1E6	189	189	203	213	123	126	96	96	178	178
D1F5	189	189	203	213	123	126	96	96	178	178
D1F6	189	189	203	213	123	126	96	96	178	178
D1G4	189	189	203	212	123	126	96	96	178	178
D1G7	189	189	203	212	123	126	96	96	178	178
D1H3	189	189	203	213	123	126	96	96	178	178
D1H8	189	189	203	213	123	126	96	96	178	178
D1I2	189	189	203	213	126	126	96	96	178	178
D1I9	189	189	203	213	127	127	96	96	178	178
D1J1	189	189	203	213	123	126	96	96	178	178
D1J10	189	189	203	203	124	124	96	96	178	178
D2A1	189	189	212	212	123	123	96	96	178	178
D2A10	189	189	213	213	123	123	96	96	178	178
D2B2	189	189	213	213	123	123	96	96	178	178
D2B9	189	189	213	213	123	123	96	96	178	178
D2C3	189	189	213	213	123	123	96	96	176	176
D2C8	189	189	213	213	123	123	96	96	177	177
D2D4	189	189	213	213	123	123	96	96	177	177
D2D7	189	189	213	213	123	123	96	96	177	177
D2E5	189	189	212	212	123	123	96	96	178	178
D2E6	189	189	212	212	123	123	96	96	178	178
D2F5	189	189	203	213	123	123	96	96	176	176
D2F6	189	189	212	212	123	123	96	96	177	177
D2G4	189	189	212	212	124	124	96	96	178	178
D2G7	188	188	212	212	123	123	96	96	178	178
D2H3	188	188	212	212	123	123	96	96	178	178
D2H8	188	188	212	212	123	123	96	96	178	178
D2I2	189	189	212	212	123	123	96	96	178	178
D2I9	189	189	212	212	123	123	96	96	178	178
D2J1	188	188	212	212	123	123	96	96	178	178
D2J10	188	188	212	212	123	123	96	96	178	178
D3A1	188	188	203	212	123	123	96	96	178	178
D3A10	188	188	203	212	123	123	96	96	178	178
D3B2	188	188	203	212	123	123	96	96	178	178
D3B9	188	188	203	212	123	123	96	96	178	178
D3C3	189	189	203	212	123	123	96	96	178	178
D3C8	189	189	203	212	123	123	96	96	178	178
D3D4	188	188	203	203	123	126	96	96	178	178
D3D7	188	188	203	212	123	123	96	96	178	178
D3E5	188	188	203	203	124	127	96	96	176	176
D3E6	188	188	203	212	123	123	96	96	176	176
D3F5	188	188	203	212	123	123	96	96	176	176
D3F6	188	188	203	212	123	123	96	96	178	178
D3G4	189	189	203	212	123	123	96	96	176	176
D3G7	189	189	203	212	123	123	96	96	178	178
D3H3	188	188	203	212	123	123	96	96	176	176
D3H8	188	188	203	212	123	123	96	96	176	176
D3I2	188	188	203	212	123	123	96	96	178	178
D3I9	188	188	203	212	123	123	96	96	178	178
D3J1	188	188	203	203	123	126	96	96	178	178
D3J10	188	188	203	212	123	123	96	96	178	178
D4A1	189	189	213	213	126	126	96	96	178	178
D4A10	189	189	203	203	123	123	96	96	178	178
D4B2	189	189	203	212	123	126	96	96	178	178
D4B9	188	188	203	203	123	123	96	96	178	178
D4C3	188	188	212	212	124	127	96	96	178	178
D4C8	188	188	212	212	127	127	96	96	178	178
D4D4	188	188	203	212	124	127	96	96	178	178
D4D7	188	188	212	212	124	127	96	96	178	178
D4E5	189	189	212	212	127	127	96	96	178	178
D4E6	189	189	203	212	123	127	96	96	178	178
D4F5	188	188	203	212	123	127	96	96	178	178
D4F6	188	188	203	212	123	127	96	96	178	178
D4G4	188	188	203	212	124	124	96	96	177	177
D4G7	188	188	212	212	127	127	96	96	177	177
D4H3	188	188	203	212	123	126	96	96	177	177
D4H8	188	188	203	212	123	126	96	96	177	177
D4I2	189	189	203	212	123	126	96	96	177	177
D4I9	189	189	203	212	123	126	96	96	177	177
D4J1	189	189	212	212	126	126	96	96	177	177
D4J10	188	188	203	212	123	126	96	96	177	177
D5A1	188	188	203	203	123	123	96	96	178	178
D5A10	188	188	203	203	123	123	96	96	178	178
D5B2	188	188	203	203	123	123	96	96	178	178
D5B9	188	188	203	203	123	123	96	96	178	178
D5C3	189	189	203	203	123	123	96	96	178	178
D5C8	189	189	203	203	123	123	96	96	178	178
D5D4	189	189	203	203	123	123	96	96	178	178
D5D7	188	188	203	203	123	123	96	96	178	178
D5E5	188	188	203	203	123	123	96	96	178	178
D5E6	188	188	203	203	123	123	96	96	178	178
D5F5	188	188	203	203	123	123	96	96	178	178
D5F6	188	188	203	203	123	126	96	96	177	177
D5G4	189	189	203	203	123	123	96	96	178	178
D5G7	189	189	203	203	123	126	96	96	177	177
D5H3	188	188	203	203	124	124	96	96	178	178
D5H8	188	188	203	203	123	126	96	96	178	178
D5I2	188	188	203	203	124	124	96	96	177	177
D5I9	188	188	203	203	124	127	96	96	176	176
D5J1	188	188	203	203	124	124	96	96	177	177
D5J10	188	188	203	203	124	127	96	96	177	177
D6A1	189	189	203	203	123	123	96	96	177	177
D6A10	189	189	203	219	124	127	96	96	177	177
D6B2	189	189	203	203	123	123	96	96	177	177
D6B9	189	189	203	203	124	124	96	96	177	177
D6C3	189	189	203	203	123	123	96	96	178	178
D6C8	189	189	203	203	123	123	96	96	177	177
D6D4	189	189	203	216	123	123	96	96	177	177
D6D7	189	189	203	203	123	123	96	96	178	178
D6E5	189	189	203	203	123	123	96	96	178	178
D6E6	189	189	203	203	123	123	96	96	178	178
D6F5	189	189	203	216	123	123	96	96	178	178
D6F6	189	189	203	216	123	123	96	96	178	178
D6G4	189	189	203	203	124	124	96	96	178	178
D6G7	189	189	203	216	123	123	96	96	178	178
D6H3	189	189	203	203	123	123	96	96	178	178
D6H8	189	189	203	203	123	123	96	96	178	178
D6I2	189	189	203	203	123	123	96	96	178	178
D6I9	189	189	203	203	123	123	96	96	178	178
D6J1	189	189	203	203	123	123	96	96	178	178
D6J10	189	189	203	203	123	123	96	96	178	178
D7A1	189	189	203	203	123	123	96	96	177	177
D7A10	189	189	203	213	123	123	96	96	176	176
D7B2	189	189	203	213	123	123	96	96	177	177
D7B9	189	189	203	213	123	123	96	96	176	176
D7C3	189	189	203	203	123	123	96	96	177	177
D7C8	189	189	203	213	123	123	96	96	177	177
D7D4	189	189	203	213	123	123	96	96	177	177
D7D7	189	189	203	213	123	123	96	96	177	177
D7E5	189	189	203	213	123	123	96	96	178	178
D7E6	189	189	203	213	123	123	96	96	178	178
D7F5	189	189	203	216	123	123	96	96	178	178
D7F6	189	189	203	213	123	123	96	96	177	177
D7G4	189	189	203	215	123	123	96	96	178	178
D7G7	189	189	203	213	123	123	96	96	178	178
D7H3	189	189	203	216	123	123	96	96	177	177
D7H8	189	189	203	213	123	123	96	96	178	178
D7I2	189	189	203	203	123	123	96	96	178	178
D7I9	189	189	203	216	123	123	96	96	178	178
D7J1	189	189	203	216	123	123	96	96	178	178
D7J10	189	189	203	213	123	123	96	96	178	178
D8A1	189	189	203	203	123	123	96	96	178	178
D8A10	189	189	203	203	123	123	96	96	178	178
D8B2	189	189	203	203	123	123	96	96	178	178
D8B9	189	189	203	203	123	123	96	96	178	178
D8C3	189	189	203	203	123	123	96	96	177	177
D8C8	189	189	203	203	123	123	96	96	177	177
D8D4	189	189	203	203	123	123	96	96	177	177
D8D7	189	189	203	203	123	123	96	96	177	177
D8E5	189	189	203	203	123	123	96	96	177	177
D8E6	189	189	203	203	123	123	96	96	177	177
D8F5	189	189	203	203	123	123	96	96	177	177
D8F6	189	189	203	203	123	123	96	96	178	178
D8G4	188	188	203	203	123	123	96	96	178	178
D8G7	188	188	203	203	123	123	96	96	177	177
D8H3	188	188	203	203	123	123	96	96	178	178
D8H8	188	188	203	203	123	123	96	96	178	178
D8I2	189	189	203	203	123	123	96	96	178	178
D8I9	189	189	203	203	123	123	96	96	178	178
D8J1	188	188	203	203	123	123	96	96	178	178
D8J10	188	188	203	203	123	123	96	96	178	178
